# Supplementary material for: Glycyrrhizin Inhibits SARS-CoV-2 Entry into Cells by Targeting ACE2
Source: MDPI journal article supplement (doi:10.3390/life12111706), 2022-10-26
Supplement: s1 [file s1]

Article

# Glycyrrhizin Inhibits SARS-CoV-2 Entry into Cells by Targeting ACE2

Ming-Feng He <sup>1,†</sup>, Jian-Hui Liang <sup>2,†</sup>, Yan-Ni Shen <sup>2,3,†</sup>, Jin-Wen Zhang <sup>2</sup>, Ying Liu <sup>4</sup>, Kuang-Yang Yang <sup>1</sup>,  
Li-Chu Liu <sup>1</sup>, Junyi Danny Wang <sup>5</sup>, Qian Xie <sup>2</sup>, Chun Hu <sup>3</sup>, Xun Song <sup>4,\*</sup> and Yan Wang <sup>2,\*</sup>

<sup>1</sup> Foshan Hospital of Traditional Chinese Medicine, Foshan 528000, China

<sup>2</sup> Center for Translation Medicine Research and Development, Shenzhen Institutes of Advanced Technology, Chinese Academy of Sciences, Shenzhen 518055, China

<sup>3</sup> Key Laboratory of Structure-based Drug Design & Discovery, Ministry of Education, School of Pharmaceutical Engineering, Shenyang Pharmaceutical University, Shenyang 110016, China

<sup>4</sup> College of Pharmacy, Shenzhen Technology University, Shenzhen 518118, China

<sup>5</sup> Bluewood Associates Co., Ltd., Suzhou 215134, China

\* Correspondence: songxun@sztu.edu.cn (X.S.); yan.wang@siat.ac.cn (Y.W.)

† These authors contributed equally to this work.

Table S1. The molecule library of traditional Chinese formulas and Chinese patent drugs

| Chinese formulas and Chinese patent drugs | Herbs (Latin name/<br>Herbal plant name if possible)        | Herbs (Chinese Pin Yin) | main chemical components                                                                                                                                                                                                                                                                         |
|-------------------------------------------|-------------------------------------------------------------|-------------------------|--------------------------------------------------------------------------------------------------------------------------------------------------------------------------------------------------------------------------------------------------------------------------------------------------|
| Angong niuhuang pill                      | borneolum syntheticum                                       | bingpian                | alphaltic acid, camphor, caryophyllene, d-borneol, dipterocarpol, dryobalanone, erythrodiol, humulene, isoborneol, oleanolic acid                                                                                                                                                                |
|                                           | bos taurus domesticus gmel                                  | niuhuang                | alanine, bilirubin, carotene, chenodeoxycholic acid, cholesterol, cholic acid, deoxycholic acid, ergosterol, glycine, lecithin, taurine                                                                                                                                                          |
|                                           | bubali cornu                                                | shuiniujiao             | alanine, arginine, aspartic acid, glutamic acid, glycine, histidine, isoleucine, l-cystine, leucine, lysine, methionine, phenylalanine, proline, serine, threonine, tyrosine                                                                                                                     |
|                                           | coptidis rhizoma/ <i>Coptis chinensis</i> Franch.           | huanglian               | (+)-5,5'-dimethoxyariciresinol, berberine, columbamine, coptisine, epiberberine, jatrorrhizine, lanicepside b, palmatine, pinosresinol, secoisolariciresinol                                                                                                                                     |
|                                           | curcumae radix/ <i>Curcuma aromatica</i> Salisb.            | yujin                   | 6-methyl-7-(3-oxobutyl)-bicyclo[4.1.0]heptan-3-one, curcumenol, curcumin, curcumin iii, demethoxy-curcumin, ethyl ferulate, ferulic acid, isocurcumenol                                                                                                                                          |
|                                           | gardeniae fructus/ <i>Gardenia jasminoides</i> J.Ellis      | zhizi                   | 6-o-b-d-glucopyranosyl-d-glucose, beta-d-gentiobiosyl crocetin, crocetin gentiobiosylglucosyl ester, crocin 4, gardenoside, genipin 1-gentiobioside, geniposide, geniposidic acid, shanzhiside                                                                                                   |
|                                           | margarita                                                   | zhenzhu                 | alanine, glutamic acid, glycine, leucine, methionine, taurine                                                                                                                                                                                                                                    |
|                                           | moschus                                                     | shexiang                | cholest-4-en-3-one, cholesterol, diolein, muscone, muscopyridine                                                                                                                                                                                                                                 |
| Da yuan decoction                         | scutellariae radix/ <i>Scutellaria baicalensis</i> Georgi   | huangqin                | baicalein, beta-caryophyllene, beta-patchoulene, chrysin, isoprene, oroxindin, oroxylin a                                                                                                                                                                                                        |
|                                           | anemarrhenae rhizoma/ <i>Anemarrhena asphodeloides</i> Bge. | zhimu                   | mangiferin, timosaponin b ii, timosaponin a i, timosaponin a iii                                                                                                                                                                                                                                 |
|                                           | arecae semen/ <i>Areca catechu</i> L.                       | binglang                | arecaidine, arecatannin b1, arecolidine, arecoline hydrobromide, catechin, epicatechin, galactose, guvacine, guvacoline, homoarecoline, isoguvacine, lauric acid, mannose, myristic acid, oleic acid, palmitic acid, procyanidin b1, procyanidin b2, proline, stearic acid, sucrose, tannic acid |

|                           |                                                                         |           |                                                                                                                                                                                                                                                                           |
|---------------------------|-------------------------------------------------------------------------|-----------|---------------------------------------------------------------------------------------------------------------------------------------------------------------------------------------------------------------------------------------------------------------------------|
| Huanglian jiedu decoction | glycyrrhizae radix et rhizoma/ <i>Glycyrrhiza uralensis</i> Fisch.      | gancao    | glabridin, glycyrrhizin, isoliquiritigenin, licorice saponin a3, licorice saponin c2, licorice saponin e2, licoricidin, uralsaponin b, glycyrrhizic acid                                                                                                                  |
|                           | magnoliae officinalis cortex/ <i>Magnolia officinalis</i> Rehd. et Wils | houpu     | (z)-1-methoxy-3,7-dimethylocta-2,6-diene, caryophyllene, cineole, honokiol, magnolol                                                                                                                                                                                      |
|                           | paeoniae radix alba/ <i>Paeonia lactiflora</i> Pall.                    | baishao   | 2'-o-benzoylpaeoniflorin, ac114r53, albiflorin, benzoylpaeoniflorin, dibutyl phthalate, ecliptasaponin a, ethyl gallate, kaempferol, loganin, paeoniflorin, saikosaponin b2, thymol-beta-d-glucoside                                                                      |
|                           | scutellariae radix/ <i>Scutellaria baicalensis</i> Georgi               | huangqin  | baicalein, beta-caryophyllene, beta-patchoulene, chrysin, isoprene, oroxindin, oroxylin a                                                                                                                                                                                 |
|                           | tsaoko fructus/ <i>Amomum tsao-ko</i> Crevost et Lemaire                | caoguo    | 2-undecenal, alpha-pinene, alpha-terpineol, beta-pinene, camphor, cineole, citral, decanal, geraniol, linalool, nerolidol, sabinene                                                                                                                                       |
|                           | coptidis rhizoma/ <i>Coptis chinensis</i> Franch.                       | huanglian | (+)-5,5'-dimethoxylariciresinol, berberine, columbamine, coptisine, epiberberine, jatrorrhizine, lanicepside b, palmatine, pinoresinol, secoisolariciresinol                                                                                                              |
| Jiedu huoxue decoction    | gardeniae fructus/ <i>Gardenia jasminoides</i> J.Ellis                  | zhizi     | 6-o-b-d-glucopyranosyl-d-glucose, beta-d-gentiobiosyl crocetin, crocetin gentiobiosylglucosyl ester, crocin 4, gardenoside, genipin 1-gentiobioside, geniposide, geniposidic acid, shanzhiside                                                                            |
|                           | Phellodendri Chinensis Cortex/ <i>Phellodendron chinense</i> Schneid.   | huangbai  | berberine, candicine, hyperoside, jatrorrhizine, limonin, obacunone, palmatine, phellodendrine                                                                                                                                                                            |
|                           | scutellariae radix/ <i>Scutellaria baicalensis</i> Georgi               | huangqin  | baicalein, beta-caryophyllene, beta-patchoulene, chrysin, isoprene, oroxindin, oroxylin a                                                                                                                                                                                 |
|                           | angelicae sinensis radix/ <i>Angelica sinensis</i> (Oliv.) Diels        | danggui   | 4-acetamino phenol, anisic acid, beta-phellandrene, butylidene phthalide, ferulic acid, isoeugenol, niacin, o-cresol, vanillin                                                                                                                                            |
| Jiedu huoxue decoction    | Aurantia fructus/ <i>Citrus aurantium</i> L.                            | zhike     | alpha-pinene, beta-pinene, caryophyllene, limonene, linalool, myrcene                                                                                                                                                                                                     |
|                           | bupleuri radix/ <i>Bupleurum chinense</i> DC.                           | chaihu    | 20-hexadecanoylingenol, 6-o-vanilloylajugol, albiflorin, capsaicin, gallic acid, glycyrrhizic acid, hesperidin, luteolin, naringin, nvr10-001e2, quercetin, quercetin chloride, saikosaponin a, saikosaponin b1, saikosaponin d, saikosaponin k, saikosaponin v, thymonin |

|                           |                                                                             |              |                                                                                                                                                                                                                                                                                                                             |
|---------------------------|-----------------------------------------------------------------------------|--------------|-----------------------------------------------------------------------------------------------------------------------------------------------------------------------------------------------------------------------------------------------------------------------------------------------------------------------------|
|                           | carthami flos/ <i>Carthamus tinctorius</i> L.                               | honghua      | carthamin, catechol, chlorogenic acid, dopa, safflomin a                                                                                                                                                                                                                                                                    |
|                           | forsythiae fructus/Forsythia suspensa (Thunb.) Vahl                         | lianqiao     | alpha-pinene, beta-ocimene, beta-phellandrene, beta-pinene, betulinic-acid, borneol, camphene, camphor, gamma-terpinene, geranial, matairesinoside, myrcene, oleanolicacid, p-cymene, phillygenin, phillyrin, pinoselinol, ursolic acid                                                                                     |
|                           | glycyrrhizae radix et rhizoma/Glycyrrhiza uralensis Fisch.                  | gancao       | glabridin, glycyrrhizin, isoliquiritigenin, licorice saponin a3, licorice saponin c2, licorice saponin e2, licoricidin, uralsaponin b, glycyrrhizic acid                                                                                                                                                                    |
|                           | persicae semen/ <i>Prunus persica</i> (L.) Batsch                           | taoren       | amygdalin, campesterol, chlorogenic acid, glucose, prunasin, sitosterol                                                                                                                                                                                                                                                     |
|                           | puerariae lobatae radix/ <i>Pueraria lobata</i> (Willd.) Ohwi               | gegen        | beta-d-glucose, daidzein, docosanoic acid, lupenone, puerarin, sitosterol, soyasaponin i                                                                                                                                                                                                                                    |
|                           | radix padoniae rubra/ <i>Paeonia lactiflora</i> Pall.                       | chishao      | albiflorin, benzoyl oxypaeoniflorin, benzoylpaeoniflorin, betulinic-acid, catechin, d-catechin, epifriedelanol, friedelin, gallic acid, gallotannin 23, hederagenin, kaempferol, lactinolide, oleanolicacid, oxypaeoniflorin, paeoniflorigenone, paeoniflorin, paeonilactone a, paeonilactone b, paeonilactone c, palbinone |
|                           | <i>Rehmanniae Radix/ Rehmannia glutinosa</i> Libosch.                       | shengdihuang | beta-sitosterol, campesterol, catalpol, mannitol, rehmannin                                                                                                                                                                                                                                                                 |
| Ma xing shi gan decoction | ephedrae herba/ <i>Ephedra sinica</i> Stapf                                 | mahuang      | d-pseudoephedrine, l-ephedrine, l-methylephedrine, norephedrine, norpseudoephedrine                                                                                                                                                                                                                                         |
|                           | glycyrrhizae radix et rhizoma/ <i>Glycyrrhiza uralensis</i> Fisch.          | gancao       | glabridin, glycyrrhizin, isoliquiritigenin, licorice saponin a3, licorice saponin c2, licorice saponin e2, licoricidin, uralsaponin b, glycyrrhizic acid                                                                                                                                                                    |
|                           | semen armeniacae amarum/ <i>Prunus armeniaca</i> L. var. <i>ansu</i> Masim. | kuxingren    | amygdalin, prunasin                                                                                                                                                                                                                                                                                                         |
| Ma xing yi gan decoction  | coicis semen/ <i>Coix lacrym-jobi</i> L. var. <i>ma-yuen</i> (Roman.) Stapf | yiiren       | coixenolide, coixol, linolein, myristic acid, oleic acid, palmitic acid, palmitin, stearate, stearic acid, stigmasterol, triolein                                                                                                                                                                                           |
|                           | ephedrae herba/ <i>Ephedra sinica</i> Stapf                                 | mahuang      | d-pseudoephedrine<br>l-ephedrine<br>l-methylephedrine<br>norephedrine<br>norpseudoephedrine                                                                                                                                                                                                                                 |
|                           | glycyrrhizae radix et rhizoma/ <i>Glycyrrhiza uralensis</i> Fisch.          | gancao       | glabridin, glycyrrhizin, isoliquiritigenin, licorice saponin a3, licorice saponin c2, licorice saponin e2, licoricidin, uralsaponin b, glycyrrhizic acid                                                                                                                                                                    |

|                            |                                                                             |             |                                                                                                                                                                                                                                                                                                                             |
|----------------------------|-----------------------------------------------------------------------------|-------------|-----------------------------------------------------------------------------------------------------------------------------------------------------------------------------------------------------------------------------------------------------------------------------------------------------------------------------|
|                            | semen armeniacae<br>amarum/ <i>Prunus armeniaca</i><br>L. var. ansu Masim.  | kuxingren   | amygdalin, prunasin                                                                                                                                                                                                                                                                                                         |
| Shengjiang powder          | bombyx batryticatus                                                         | baijiangcan | 3-hydroxykynurenine, ammonium oxalate, aspartic acid, bassianin, beauverolide d, beauverolide ea, beauverolide f, beauverolide h, beauverolide ja, ecdysterone, leucine, lysine, oxalic acid, palmitic acid                                                                                                                 |
|                            | cicadaeperiostracum                                                         | chantui     | acetylglucosamine, alanine, aspartic acid, erythropterin, glutamic acid, isoxanthopterin, l-valine, proline                                                                                                                                                                                                                 |
|                            | curcumae longae rhizome/<br><i>Curcuma longa</i> L.                         | jianghuang  | alpha-curcumene, alpha-pinene, alpha-terpinene, ar-curcumene, ar-turmerone, beta-curcumene, beta-pinene, beta-turmerone, bisdemethoxycurcumin, borneol, caryophyllene, cineole, curcumin, curcumol, curdione, curzerenone, demethoxy-curcumin, dihydrocurcumin, gamma-curcumene, germacrone, limonene, linalool, turmeronol |
|                            | rhei radix et rhizoma/ <i>Rheum palmatum</i> L.                             | dahuang     | c, sennoside a, sennoside b, sennoside c monoglucoside, rheidin a, rheidin b, rheidin c, rhein, rheinoside a, rheinoside aloe-emodin, beta-sitosterol, chrysophanol, cinchophen, emodin, emodin-8-glucoside, eupatin, palmidin a, palmidin b, palmidin c, physcion, physcion                                                |
| Sini jia renshen decoction | aconiti lateralis radix praepar/<br><i>Aconitum carmichaelii</i> Debx.      | fuzi        | aconine, benzoyleaconine, benzoylmesaconine, hypaconine, mesaconine                                                                                                                                                                                                                                                         |
|                            | ginseng radix et rhizome/<br><i>Panax ginseng</i> C. A. Mey.                | renshen     | dammar-24-ene-3, notoginsenoside r4, protopanaxatriol                                                                                                                                                                                                                                                                       |
|                            | glycyrrhizae radix et<br>rhizoma/ <i>Glycyrrhiza uralensis</i> Fisch.       | gancao      | glabridin, glycyrrhizin, isoliquiritigenin, licorice saponin a3, licorice saponin c2, licorice saponin e2, licoricidin, uralsaponin b, glycyrrhizic acid                                                                                                                                                                    |
|                            | zingiberis rhizome/ <i>Zingiber officinale</i> (Willd.) Rosc.               | ganjiang    | 10-gingerol, 6-dehydrogingerdione, 6-gingerol, 6-shogaol, beta-sitosteryl palmitate, dibutyl phthalate, hexahydrocurcumin, paradol, tetracosanoic acid, triacontanoic acid, zingerone                                                                                                                                       |
| Suhexiang pill             | aquilariae lignum<br>resinat/ <i>Aquilaria sinensis</i><br>(Lour.) Gilg     | chenxiang   | agarospirol, baimuxinal, baimuxinic acid, baimuxinol, caryophyllene oxide                                                                                                                                                                                                                                                   |
|                            | atractylodes macrocephala<br>koidz/ <i>Atractylodes macrocephala</i> Koidz. | baizhu      | beta-elemene                                                                                                                                                                                                                                                                                                                |
|                            | aucklandiae radix/ <i>Aucklandia lappa</i> Decne.                           | muxiang     | bicyclo[2.2.1]hept-2-ene, borneol, decane, octane, phenylethanol                                                                                                                                                                                                                                                            |

|                           |                                                                      |             |                                                                                                                                                                                                                                                                              |
|---------------------------|----------------------------------------------------------------------|-------------|------------------------------------------------------------------------------------------------------------------------------------------------------------------------------------------------------------------------------------------------------------------------------|
|                           | benzoinum                                                            | anxixiang   | benzaldehyde, benzyl cinnamate, cinnamaldehyde, cinnamyl cinnamate, styrene                                                                                                                                                                                                  |
|                           | borneolum syntheticum                                                | bingpian    | aliphatic acid, beta-elemene, borneol, camphor, caryophyllene, d-borneol, dipterocarpol, dryobalanone, erythrodiol, humulene, isoborneol, oleanolic acid                                                                                                                     |
|                           | bubali cornu                                                         | shuiniujiao | alanine, arginine, aspartic acid, glutamic acid, glycine, histidine, isoleucine, l-cystine, leucine, lysine, methionine, phenylalanine, proline, serine, threonine, tyrosine                                                                                                 |
|                           | caryophylli flos/ <i>Eugenia caryophyllata</i> Thunb.                | dingxiang   | benzaldehyde, benzyl acetate, beta-caryophyllene, eugenol, eugenol acetate                                                                                                                                                                                                   |
|                           | chebulae fructus                                                     | hezirou     | beta-sitosterol, chebulagic acid, chebulinic acid, corilagin, gallic acid, pentagalloylglucose, quinic acid, sennoside a, shikimic acid                                                                                                                                      |
|                           | cyperi rhizome/ <i>Cyperus rotundus</i> L.                           | xiangfu     | alpha-cyperone, beta-selinene, cyperene, cyperol, terpinen-4-ol                                                                                                                                                                                                              |
|                           | moschus                                                              | shexiang    | cholest-4-en-3-one, cholesterol, diosgenin, muscone, muscopyridine                                                                                                                                                                                                           |
|                           | olibanum                                                             | ruxiang     | alpha-boswellic acid, beta-boswellic acid, elemonic acid, glycerol monopalmitate, linalool                                                                                                                                                                                   |
|                           | piperis longi fructus/ <i>Piper longum</i> L.                        | biba        | 2-phenylpropionic acid, beta-sitosterol, methyl piperate, pellitorine, piperanine, piperine, pipernonaline                                                                                                                                                                   |
|                           | santali albi lignum/ <i>Santalum albm</i> L.                         | tanxiang    | alpha-curcumen, limonene, nuciferol, santalene, santalol                                                                                                                                                                                                                     |
| Xuanbai chengqi decoction | styrax                                                               | suhexiang   | (1,4a-dimethyl-7-propan-2-yl-2,3,4,4b,5,6,7,8,8a,9,10,10a-dodecahydrophenanthren-1-yl)methanol, benzyl benzoate, benzyl cinnamate, caryophyllene, myrcene                                                                                                                    |
|                           | rhei radix et rhizoma/ <i>Rheum palmatum</i> L.                      | dahuang     | c, sennoside a, sennoside b, sennoside c monoglucoside, rheidin a, rheidin b, rheidin c, rhein, rheinoside a, rheinoside aloe-emodin, beta-sitosterol, chrysophanol, cinchophen, emodin, emodin-8-glucoside, eupatin, palmidin a, palmidin b, palmidin c, physcion, physcion |
|                           | semen armeniacae amarum/ <i>Prunus armeniaca</i> L. var. ansu Masim. | kuxingren   | amygdalin, prunasin                                                                                                                                                                                                                                                          |
|                           | trichosanthis fructus                                                | gualou      | alanine, arginine, campesterol, cerotic acid, glycine, isoleucine, leucine, l-valine, lysine, oleic acid, palmitic acid, punicic acid, tetracosanoic acid                                                                                                                    |
| Yin qiao powder           | arctii fructus/ <i>Arctium lappa</i> L.                              | niubangzi   | arachidic acid, arctigenin, arctiin, glucose, lappal b, matairesinol,                                                                                                                                                                                                        |

|               |                                                                           |             |                                                                                                                                                                                                                                                                                                                                                                                                                                                                                                                                                                                                                                                                                                                                                                                                                                                                                                                                                                                                                                                                                                                                                                                                                                                                                                                        |
|---------------|---------------------------------------------------------------------------|-------------|------------------------------------------------------------------------------------------------------------------------------------------------------------------------------------------------------------------------------------------------------------------------------------------------------------------------------------------------------------------------------------------------------------------------------------------------------------------------------------------------------------------------------------------------------------------------------------------------------------------------------------------------------------------------------------------------------------------------------------------------------------------------------------------------------------------------------------------------------------------------------------------------------------------------------------------------------------------------------------------------------------------------------------------------------------------------------------------------------------------------------------------------------------------------------------------------------------------------------------------------------------------------------------------------------------------------|
| Zi xue powder | bambusae caulis in taenias/<br><i>Bambusa tuldoidea</i> Munro             | zhuye       | menthone, oleic acid, palmitic acid,<br>stearic acid, trachelogenin<br>d-fucose, isoorientin, kaempferol-3-o-<br>beta-d-glucoside, kaempferol-3-<br>rutinoside, luteolin-7-o-glucoside,<br>lysine, mannose, orientin, rhamnose,<br>rutin, trans-2-hexenal, vitexin<br>alpha-pinene, beta-ocimene, beta-<br>phellandrene, beta-pinene, betulinic-<br>acid, borneol, camphene, camphor,<br>gamma-terpinene, geranial,<br>matairesinoside, myrcene,<br>oleanolic acid, p-cymene, phillygenin,<br>phillyrin, pinoselinol, ursolic acid<br>glabridin, glycyrrhizin, isoliquiritigenin,<br>licorice saponin a3, licorice saponin c2,<br>licorice saponin e2, licoricidin,<br>uralsaponin b, glycyrrhizic acid<br>beta-sitosterol, chlorogenic acid,<br>isochlorogenic acid, linalool,<br>stigmasterol, trans-trans-farnesol<br>carvone, linalool, l-menthol, piperitone,<br>p-menthan-3-one<br>1-undecene, isopropyl formate,<br>linolenic acid, luteolin-7-o-rutinoside,<br>oleic acid, palmitic acid, platycodin a,<br>platycodin d2, quercetin-7-o-rutinoside,<br>quercimeritrin, stearic acid, taxifolin<br>apigenin, beta-sitosterol, hesperidin,<br>luteolin, p-coumaric acid, tilianin,<br>ursolic acid<br>asparagine, carotene, choline, daidzein,<br>daidzin, genistin, glycine, niacin,<br>syringic acid, xanthine |
|               | forsythiae fructus/ <i>Forsythia<br/>suspensa</i> (Thunb.) Vahl           | lianqiao    |                                                                                                                                                                                                                                                                                                                                                                                                                                                                                                                                                                                                                                                                                                                                                                                                                                                                                                                                                                                                                                                                                                                                                                                                                                                                                                                        |
|               | glycyrrhizae radix et<br>rhizoma/ <i>Glycyrrhiza<br/>uralensis</i> Fisch. | gancao      |                                                                                                                                                                                                                                                                                                                                                                                                                                                                                                                                                                                                                                                                                                                                                                                                                                                                                                                                                                                                                                                                                                                                                                                                                                                                                                                        |
|               | lonicerae japonicae/ <i>Lonicera<br/>japonica</i> Thunb.                  | jinyinhua   |                                                                                                                                                                                                                                                                                                                                                                                                                                                                                                                                                                                                                                                                                                                                                                                                                                                                                                                                                                                                                                                                                                                                                                                                                                                                                                                        |
|               | menthae haplocalycis herba/<br><i>Mentha haplocalyx</i> Briq.             | bohe        |                                                                                                                                                                                                                                                                                                                                                                                                                                                                                                                                                                                                                                                                                                                                                                                                                                                                                                                                                                                                                                                                                                                                                                                                                                                                                                                        |
|               | platycodonis radix/<br><i>Platycodon grandiflorum</i><br>(Jacq.) A. DC.   | jiegeng     |                                                                                                                                                                                                                                                                                                                                                                                                                                                                                                                                                                                                                                                                                                                                                                                                                                                                                                                                                                                                                                                                                                                                                                                                                                                                                                                        |
|               | schizonepetae herba/<br><i>Schizonepeta tenuifolia</i> Briq.              | jingjiesui  |                                                                                                                                                                                                                                                                                                                                                                                                                                                                                                                                                                                                                                                                                                                                                                                                                                                                                                                                                                                                                                                                                                                                                                                                                                                                                                                        |
|               | sojae semen praeparatum/<br><i>Glycine max</i> (L.) Merr.                 | dandouchi   |                                                                                                                                                                                                                                                                                                                                                                                                                                                                                                                                                                                                                                                                                                                                                                                                                                                                                                                                                                                                                                                                                                                                                                                                                                                                                                                        |
|               | aquilariae lignum<br>resinat/ <i>Aquilaria sinensis</i><br>(Lour.) Gilg   | chenxiang   | agarospirol, baimuxinal, baimuxinic<br>acid, baimuxinol, caryophyllene oxide                                                                                                                                                                                                                                                                                                                                                                                                                                                                                                                                                                                                                                                                                                                                                                                                                                                                                                                                                                                                                                                                                                                                                                                                                                           |
|               | aucklandiae radix/ <i>Aucklandia<br/>lappa</i> Decne.                     | muxiang     | bicyclo[2.2.1]hept-2-ene, borneol,<br>decane, octane, phenylethanol<br>alanine, arginine, aspartic acid,<br>glutamic acid, glycine, histidine,<br>isoleucine, l-cystine, leucine, lysine,<br>methionine, phenylalanine, proline,<br>serine, threonine, tyrosine                                                                                                                                                                                                                                                                                                                                                                                                                                                                                                                                                                                                                                                                                                                                                                                                                                                                                                                                                                                                                                                        |
|               | bubali cornu                                                              | shuiniujiao | benzaldehyde, benzyl acetate, beta-<br>caryophyllene, eugenol, eugenol acetate<br>3-methyl-5 (2,6, 6-trimethyl-1-<br>cyclohexene) -2-pentenoic acid, 9,17-<br>octadecadienal, beta-elemene, linoleyl<br>alcohol, palmitic acid<br>glabridin, glycyrrhizin, isoliquiritigenin,<br>licorice saponin a3, licorice saponin c2,                                                                                                                                                                                                                                                                                                                                                                                                                                                                                                                                                                                                                                                                                                                                                                                                                                                                                                                                                                                             |
|               | caryophylli flos/ <i>Eugenia<br/>caryophyllata</i> Thunb.                 | dingxiang   |                                                                                                                                                                                                                                                                                                                                                                                                                                                                                                                                                                                                                                                                                                                                                                                                                                                                                                                                                                                                                                                                                                                                                                                                                                                                                                                        |
|               | cimicifugae rhizoma                                                       | shengma     |                                                                                                                                                                                                                                                                                                                                                                                                                                                                                                                                                                                                                                                                                                                                                                                                                                                                                                                                                                                                                                                                                                                                                                                                                                                                                                                        |
|               | glycyrrhizae radix et<br>rhizoma/ <i>Glycyrrhiza<br/>uralensis</i> Fisch. | gancao      |                                                                                                                                                                                                                                                                                                                                                                                                                                                                                                                                                                                                                                                                                                                                                                                                                                                                                                                                                                                                                                                                                                                                                                                                                                                                                                                        |

---

|  |                                                                   |              |                                                                                                                                              |
|--|-------------------------------------------------------------------|--------------|----------------------------------------------------------------------------------------------------------------------------------------------|
|  |                                                                   |              | licorice saponin e2, licoricidin,<br>uralsaponin b, glycyrrhizic acid                                                                        |
|  | moschus                                                           | shexiang     | cholest-4-en-3-one, cholesterin, diolein,<br>muscone, muscopyridine                                                                          |
|  | saiga tatarica linnaeus                                           | lingyangjiao | aspartic acid, dipalmitoyl cephalin,<br>glutamic acid, lecithins, leucine, lysine,<br>phenylalanine, phosphatidylserine,<br>serine, tyrosine |
|  | scrophulariae radix/<br><i>Scrophularia ningpoensis</i><br>Hensl. | xuanshen     | acteoside, angoroside c, cistanoside d,<br>cistanoside f, ningposide a, ningposide<br>b, ningposide c, ningposide d,<br>sibirioside a        |

---



**Table S2. Target protein setup**

| Target protein          | Protein ID in PDB | grid box radius |
|-------------------------|-------------------|-----------------|
| ACE2                    | 1R4L              | 25Å             |
| SARS-CoV-2 chimeric RBD | 6VW1              | 25Å             |
| RdRp                    | 6M71              | 25Å             |
| Mpro                    | 6LU7              | 25Å             |

**Table S3. GO enrichment analysis**

| <b>Term</b>                                                    | <b>Count</b> | <b>%</b> | <b>PValue</b> |
|----------------------------------------------------------------|--------------|----------|---------------|
| GO:0006954~inflammatory response                               | 5            | 7.04225  | 0.00235       |
| GO:0006955~immune response                                     | 4            | 5.63380  | 0.00966       |
| GO:0007009~plasma membrane organization                        | 2            | 2.81690  | 0.04729       |
| GO:0035329~hippo signaling                                     | 2            | 2.81690  | 0.04729       |
| GO:0001974~blood vessel remodeling                             | 2            | 2.81690  | 0.08355       |
| GO:0031623~receptor internalization                            | 2            | 2.81690  | 0.08946       |
| GO:0008543~fibroblast growth factor receptor signaling pathway | 2            | 2.81690  | 0.09240       |
| GO:0010629~negative regulation of gene expression              | 3            | 4.22535  | 0.09379       |
